# Supplementary material
Source: MDPI journal article supplement (https://www.mdpi.com/1424-8247/16/5/719)
Supplement: s1 [file s1]

# Supplementary Material

## Supplementary Figures

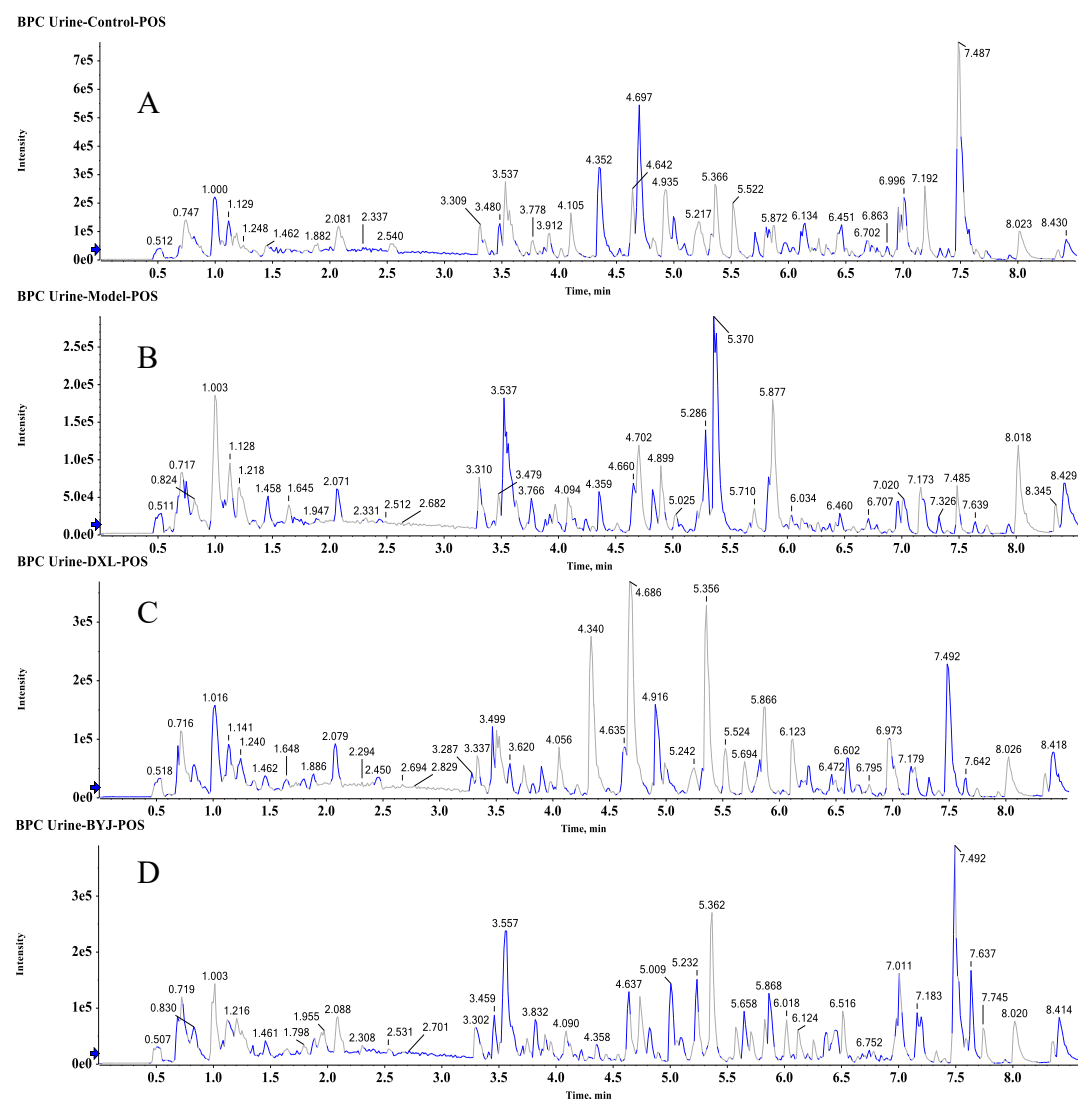

**Figure S1.** Urine BPC chromatograms of the AUB model rats treated by BYJ and DXL under positive ion mode. (A) Control group; (B) AUB model group; (C) DXL group; (D) BYJ group

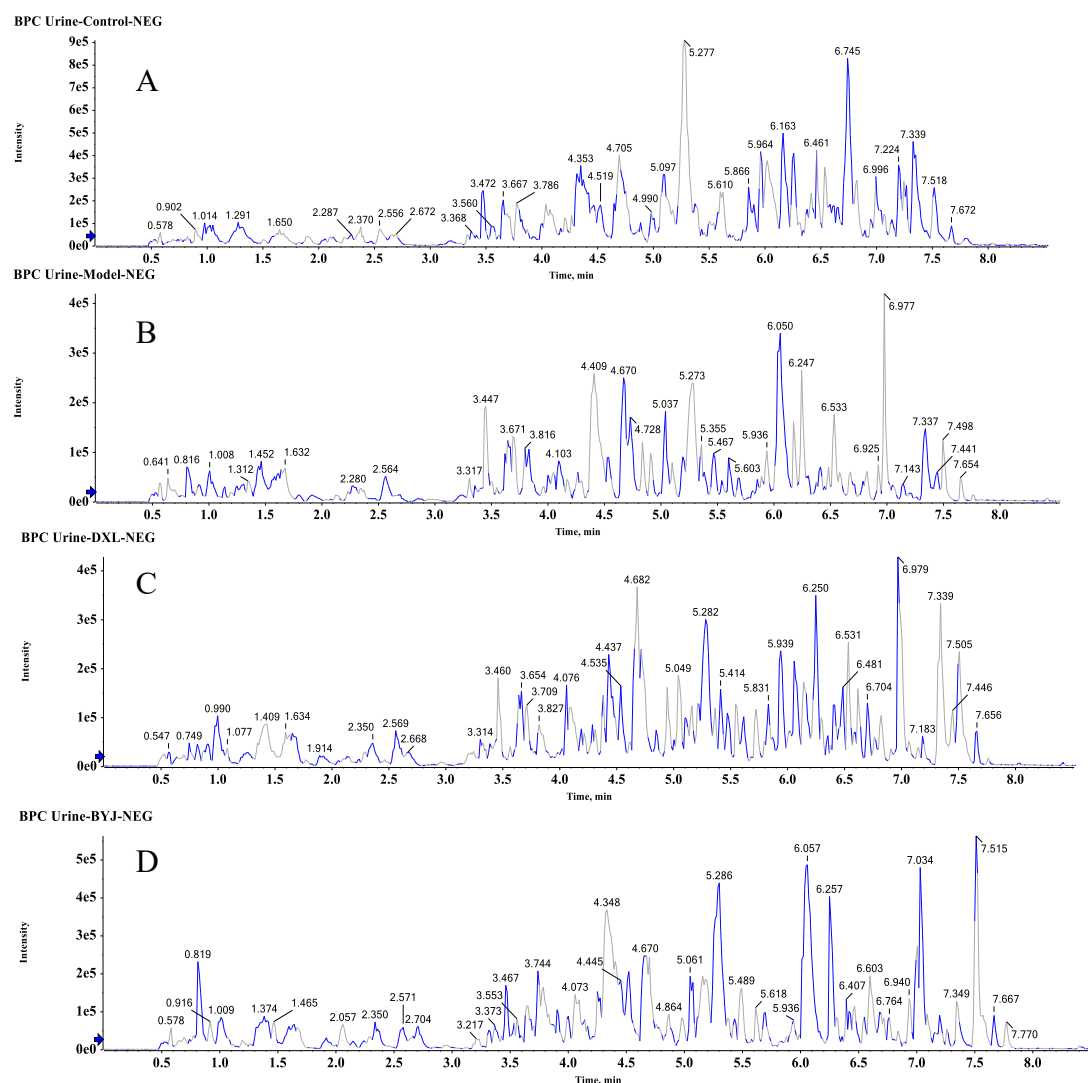

**Figure S2.** Urine BPC chromatograms of the AUB model rats treated by BYJ and DXL under negative ion mode. (A) Control group; (B) AUB model group; (C) DXL group; (D) BYJ group

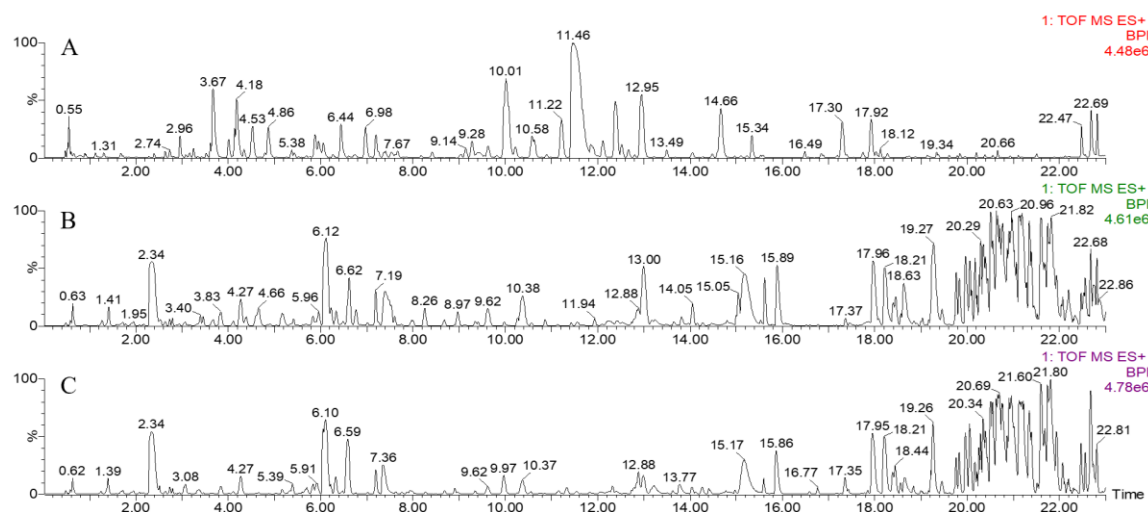

**Figure S3.** Chromatograms in serum pharmacokinetics analysis under positive ion mode. (A) BYJ *in vitro* sample; (B) AUB model serum sample; (C) Drug-containing serum sample.

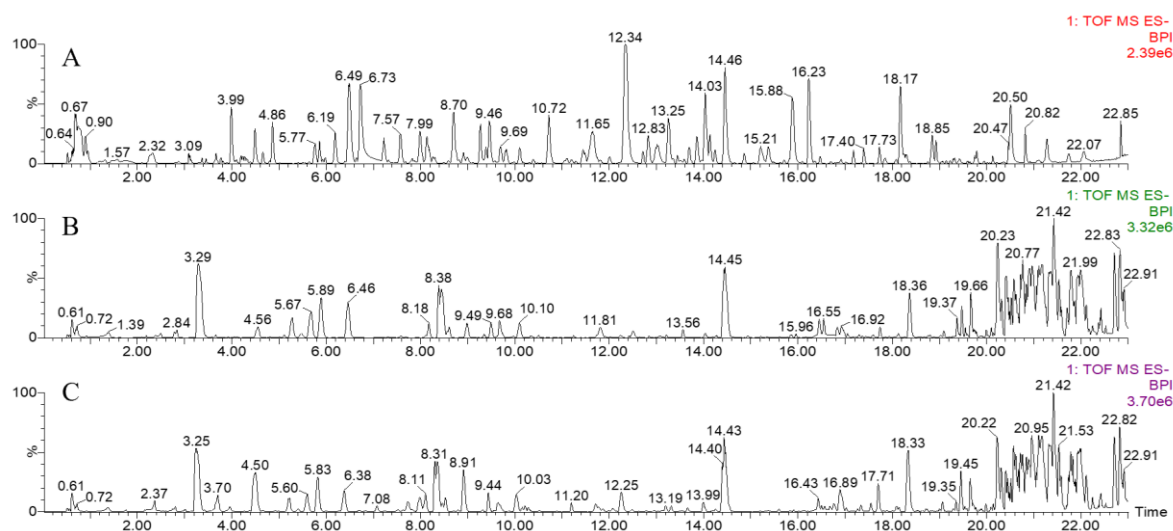

**Figure S4.** Chromatograms in serum pharmacokinetics analysis under negative ion mode.

(A) BYJ *in vitro* sample; (B) AUB model serum sample; (C) Drug-containing serum sample.

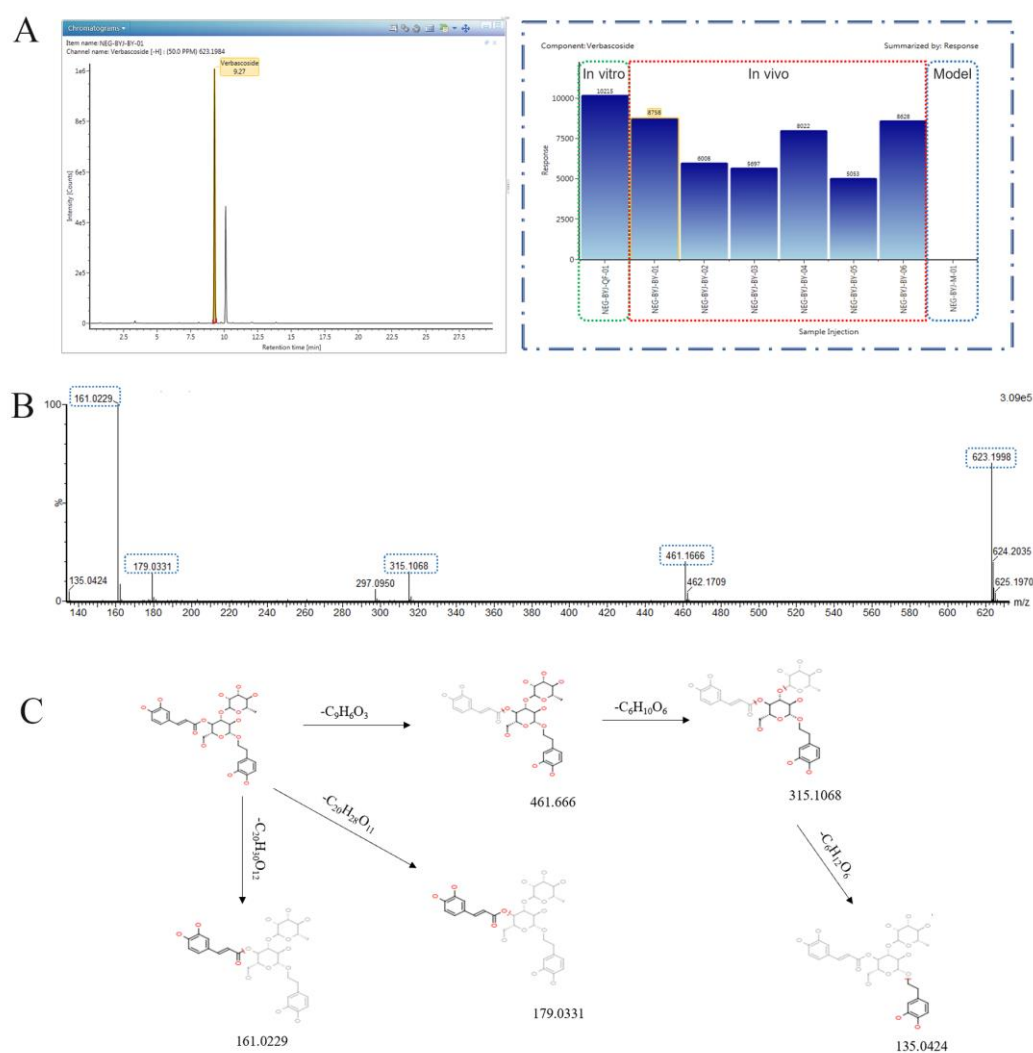

**Figure S5.** Correlation mass spectrum and cleavage pathway of verbascoside

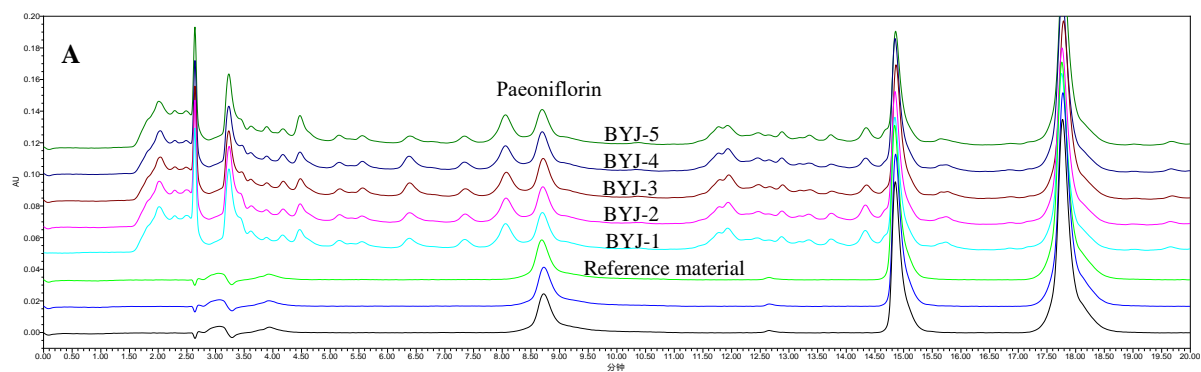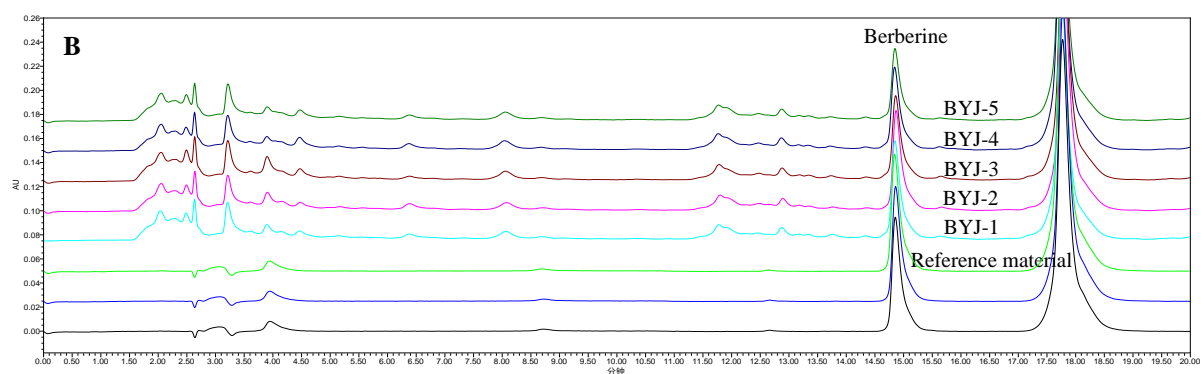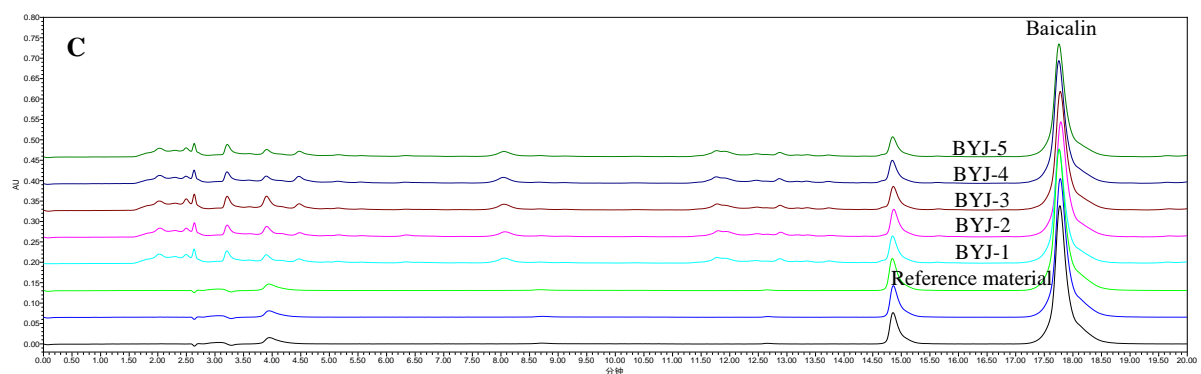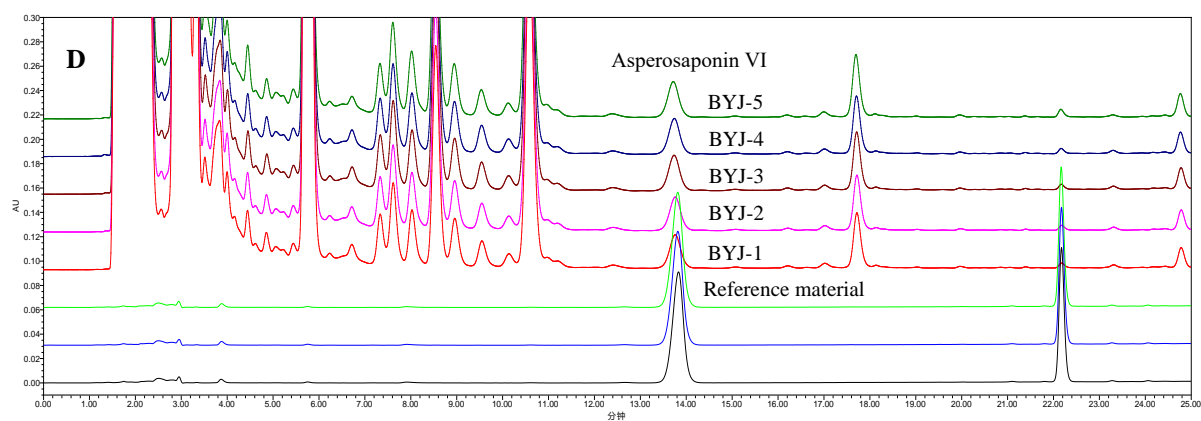

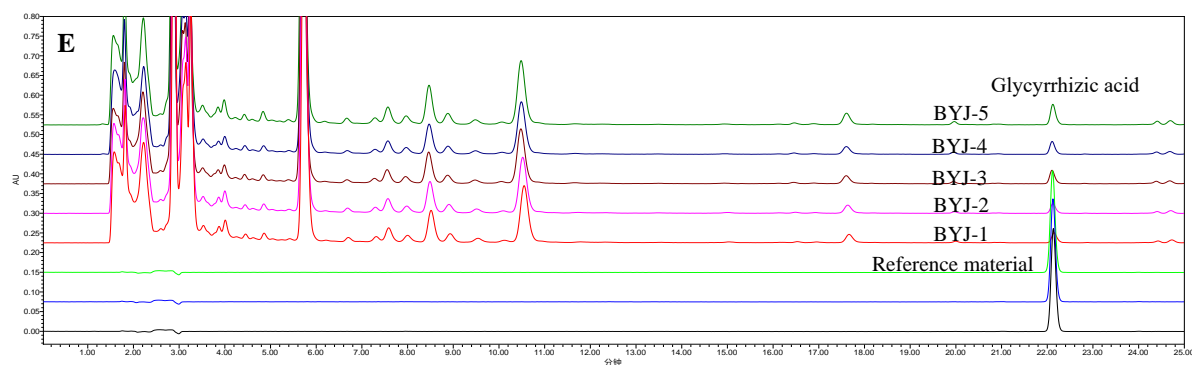

**Figure S6.** Content determination of BYJ

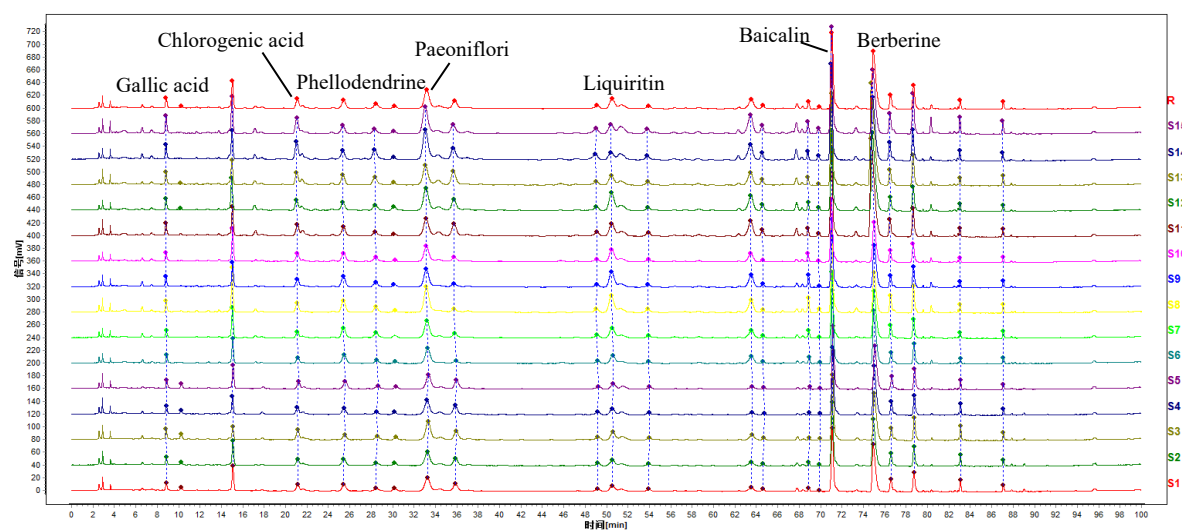

**Figure S7.** Fingerprint similarity of 15 batches of BYJ

## Supplementary Tables

**Table S1.** Model parameter of OPLS-DA

| OPLS-DA | R <sup>2</sup> Y(cum) | Q <sup>2</sup> (cum) | Intercept of R <sup>2</sup> | Intercept of Q <sup>2</sup> |
|---------|-----------------------|----------------------|-----------------------------|-----------------------------|
| POS     | 0.995                 | 0.927                | 0.923                       | -0.242                      |
| Neg     | 0.986                 | 0.904                | 0.946                       | -0.357                      |

**Table S2.** Results of metabolic pathway analysis of AUB-related markers based on MetPA

| NO. | Pathway name                                           | Class                                | Total | Hits | Raw p     | -log(p) | Impact  |
|-----|--------------------------------------------------------|--------------------------------------|-------|------|-----------|---------|---------|
| 1   | Arachidonic acid metabolism                            | Lipid metabolism                     | 36    | 7    | 0.000005  | 5.2737  | 0.43392 |
| 2   | Steroid hormone biosynthesis                           | Lipid metabolism                     | 77    | 6    | 0.004586  | 2.3386  | 0.21318 |
| 3   | Glycerophospholipid metabolism                         | Lipid metabolism                     | 36    | 4    | 0.0061399 | 2.2118  | 0.30986 |
| 4   | Tryptophan metabolism                                  | Amino acid metabolism                | 41    | 4    | 0.0097951 | 2.009   | 0.19641 |
| 5   | alpha-Linolenic acid metabolism                        | Lipid metabolism                     | 13    | 2    | 0.02949   | 1.5303  | 0.33333 |
| 6   | Retinol metabolism                                     | Metabolism of cofactors and vitamins | 16    | 2    | 0.04361   | 1.3604  | 0.22754 |
| 7   | Citrate cycle (TCA cycle)                              | Carbohydrate metabolism              | 20    | 2    | 0.065517  | 1.1836  | 0.14894 |
| 8   | Alanine, aspartate and glutamate metabolism            | Amino acid metabolism                | 28    | 2    | 0.11745   | 0.93014 | 0.04808 |
| 9   | D-Glutamine and D-glutamate metabolism                 | Amino acid metabolism                | 6     | 1    | 0.1211    | 0.91687 | 0       |
| 10  | Purine metabolism                                      | Nucleotide metabolism                | 66    | 3    | 0.16205   | 0.79034 | 0.01602 |
| 11  | Biosynthesis of unsaturated fatty acids                | Lipid metabolism                     | 36    | 2    | 0.1766    | 0.753   | 0       |
| 12  | Arginine biosynthesis                                  | Amino acid metabolism                | 14    | 1    | 0.26066   | 0.58392 | 0       |
| 13  | Glycosylphosphatidylinositol (GPI)-anchor biosynthesis | Glycan biosynthesis and metabolism   | 14    | 1    | 0.26066   | 0.58392 | 0.00399 |

| NO. | Pathway name                            | Class                   | Total | Hits | Raw p   | -log(p) | Impact  |
|-----|-----------------------------------------|-------------------------|-------|------|---------|---------|---------|
| 14  | Butanoate metabolism                    | Carbohydrate metabolism | 15    | 1    | 0.27652 | 0.55827 | 0       |
| 15  | Glycerolipid metabolism                 | Lipid metabolism        | 16    | 1    | 0.29205 | 0.53455 | 0.01246 |
| 16  | Ether lipid metabolism                  | Lipid metabolism        | 20    | 1    | 0.35099 | 0.4547  | 0       |
| 17  | Pentose phosphate pathway               | Carbohydrate metabolism | 22    | 1    | 0.37865 | 0.42176 | 0.04712 |
| 18  | Phosphatidylinositol signaling system   | Signal transduction     | 28    | 1    | 0.45495 | 0.34203 | 0.00152 |
| 19  | Glyoxylate and dicarboxylate metabolism | Carbohydrate metabolism | 32    | 1    | 0.50069 | 0.30043 | 0.03175 |
| 20  | Tyrosine metabolism                     | Amino acid metabolism   | 42    | 1    | 0.59936 | 0.22231 | 0.01751 |

**Table S3.** Identification of the components in serum after oral administration of BYJ solution

| NO. | R <sub>t</sub><br>(min) | Formula                                         | Component                                                                                                               | Neutral mass<br>(Da) | Observed<br>m/z | Mass error<br>(mDa) | Ion mode                | Fragment    | Origin |
|-----|-------------------------|-------------------------------------------------|-------------------------------------------------------------------------------------------------------------------------|----------------------|-----------------|---------------------|-------------------------|-------------|--------|
| 1   | 1.90                    | C <sub>15</sub> H <sub>22</sub> O <sub>10</sub> | Catalpol                                                                                                                | 362.1218             | 407.12          | 0.5                 | [M-H-COOH] <sup>-</sup> | 199/181/169 | a,b    |
| 2   | 2.00                    | C <sub>7</sub> H <sub>6</sub> O <sub>5</sub>    | Gallic acid                                                                                                             | 170.0215             | 169.014         | -0.3                | [M-H] <sup>-</sup>      | 125/107/97  | c,g    |
| 3   | 2.52                    | C <sub>20</sub> H <sub>30</sub> O <sub>12</sub> | Verbascoside-C <sub>9</sub> H <sub>6</sub> O <sub>3</sub> (cleavage)                                                    | 462.1722             | 463.1794        | -1.6                | [M+H] <sup>+</sup>      | 286/255/184 | a,b    |
| 4   | 2.61                    | C <sub>16</sub> H <sub>26</sub> O <sub>10</sub> | Logaric acid (Loganic acid)+H <sub>2</sub>                                                                              | 378.1532             | 377.1459        | 0.5                 | [M-H] <sup>-</sup>      | 328/300/192 | f      |
| 5   | 2.77                    | C <sub>11</sub> H <sub>12</sub> O <sub>7</sub>  | Catalpol-C <sub>6</sub> H <sub>10</sub> O <sub>5</sub> (cleavage)+O-<br>H <sub>2</sub> +C <sub>2</sub> H <sub>2</sub> O | 256.0592             | 255.0519        | 0.9                 | [M-H] <sup>-</sup>      | 225/218/137 | a,b    |
| 6   | 2.86                    | C <sub>9</sub> H <sub>6</sub> O <sub>3</sub>    | Verbascoside-C <sub>20</sub> H <sub>28</sub> O <sub>12</sub> (cleavage)-<br>H <sub>2</sub>                              | 162.0329             | 163.0401        | 1.2                 | [M+H] <sup>+</sup>      | 146/128/120 | a,b    |
| 7   | 2.95                    | C <sub>15</sub> H <sub>24</sub> O <sub>9</sub>  | Ajugol                                                                                                                  | 348.14203            | 347.1342        | 0.5                 | [M-H] <sup>-</sup>      | 329/167/149 | a,b    |
| 8   | 3.09                    | C <sub>27</sub> H <sub>42</sub> O <sub>20</sub> | Rehmannioside D                                                                                                         | 686.22694            | 731.2255        | 0.3                 | [M-H-COOH] <sup>-</sup> | 505/323/179 | a,b    |
| 9   | 3.66                    | C <sub>16</sub> H <sub>24</sub> O <sub>10</sub> | 8-Epiloganic acid                                                                                                       | 376.13695            | 375.1291        | 0                   | [M-H] <sup>-</sup>      | 213/169/151 | a,b    |

| NO. | R <sub>t</sub><br>(min) | Formula                                           | Component                                                                                                     | Neutral mass<br>(Da) | Observed<br>m/z | Mass error<br>(mDa) | Ion mode                | Fragment    | Origin |
|-----|-------------------------|---------------------------------------------------|---------------------------------------------------------------------------------------------------------------|----------------------|-----------------|---------------------|-------------------------|-------------|--------|
| 10  | 3.93                    | C <sub>25</sub> H <sub>20</sub> NO <sub>9</sub>   | Berberine-CHO(cleavage)+2x(-<br>H <sub>2</sub> )+C <sub>6</sub> H <sub>8</sub> O <sub>6</sub>                 | 478.1109             | 479.1182        | -2.8                | [M+H] <sup>+</sup>      | 381/197/127 | e      |
| 11  | 3.94                    | C <sub>16</sub> H <sub>24</sub> O <sub>10</sub>   | Loganic acid                                                                                                  | 376.1369             | 375.1291        | 0.6                 | [M-H] <sup>-</sup>      | 213/169/151 | f      |
| 12  | 4.11                    | C <sub>16</sub> H <sub>18</sub> O <sub>9</sub>    | Chlorogenic acid                                                                                              | 354.09508            | 353.0873        | 0.1                 | [M-H] <sup>-</sup>      | 191/179/173 | e,f    |
| 13  | 4.21                    | C <sub>20</sub> H <sub>24</sub> NO <sub>4</sub>   | Phellodendrine                                                                                                | 342.1705             | 342.1725        | 0.7                 | M <sup>+</sup>          | 192/177/237 | e      |
| 14  | 4.34                    | C <sub>16</sub> H <sub>18</sub> O <sub>9</sub>    | Neochlorogenic acid                                                                                           | 354.09508            | 353.0879        | 0                   | [M-H] <sup>-</sup>      | 191/179/173 | e,f    |
| 15  | 4.45                    | C <sub>23</sub> H <sub>28</sub> O <sub>12</sub>   | Oxypaeoniflorin                                                                                               | 496.1581             | 495.1511        | 0.3                 | [M-H] <sup>-</sup>      | 465/333/165 | c      |
| 16  | 4.86                    | C <sub>9</sub> H <sub>8</sub> O <sub>4</sub>      | Caffeic acid                                                                                                  | 180.04226            | 179.035         | 0                   | [M-H] <sup>-</sup>      | 161/135     | a,b    |
| 17  | 5.36                    | C <sub>25</sub> H <sub>26</sub> NO <sub>10</sub>  | Berberine-CH(cleavage)+H <sub>2</sub> +C <sub>6</sub> H <sub>8</sub> O <sub>6</sub>                           | 500.1515             | 500.1515        | -4.3                | M <sup>+</sup>          | 452/324/201 | e      |
| 18  | 5.71                    | C <sub>21</sub> H <sub>20</sub> O <sub>10</sub>   | Liquiritigenin+C <sub>6</sub> H <sub>8</sub> O <sub>6</sub>                                                   | 432.1058             | 433.1131        | 0.1                 | [M+H] <sup>+</sup>      | 257/211/137 | h      |
| 19  | 5.92                    | C <sub>15</sub> H <sub>12</sub> O <sub>4</sub>    | Liquiritigenin                                                                                                | 256.07356            | 255.0659        | -0.4                | [M-H] <sup>-</sup>      | 135/119     | h      |
| 20  | 5.94                    | C <sub>17</sub> H <sub>26</sub> O <sub>10</sub>   | Loganin                                                                                                       | 390.1526             | 435.1506        | -0.2                | [M-H-COOH] <sup>-</sup> | 343/195/181 | f      |
| 21  | 6.19                    | C <sub>23</sub> H <sub>28</sub> O <sub>11</sub>   | Albiflorin                                                                                                    | 480.1582             | 525.1582        | 0.4                 | [M-H-COOH] <sup>-</sup> | 449/327/165 | c      |
| 22  | 6.29                    | C <sub>17</sub> H <sub>20</sub> O <sub>9</sub>    | 4-O-Feruloylquinic acid                                                                                       | 368.1107             | 367.1029        | 1                   | [M-H] <sup>-</sup>      | 173/193/191 | e      |
| 23  | 6.37                    | C <sub>17</sub> H <sub>18</sub> O <sub>8</sub> S  | Paeoniflorin-C <sub>6</sub> H <sub>10</sub> O <sub>6</sub> (cleavage)+SO <sub>3</sub>                         | 382.068              | 381.0607        | -4.3                | [M-H] <sup>-</sup>      | 265/175/113 | c      |
| 24  | 6.73                    | C <sub>23</sub> H <sub>28</sub> O <sub>11</sub>   | Paeoniflorin                                                                                                  | 480.1582             | 525.1582        | 0                   | [M-H-COOH] <sup>-</sup> | 449/327/165 | c      |
| 25  | 7.08                    | C <sub>15</sub> H <sub>10</sub> O <sub>7</sub>    | QuerceTIN                                                                                                     | 302.0427             | 301.0348        | 0.3                 | [M-H] <sup>-</sup>      | 274/151     | h      |
| 26  | 7.29                    | C <sub>23</sub> H <sub>26</sub> O <sub>14</sub> S | Albiflorin-H <sub>2</sub> +SO <sub>3</sub>                                                                    | 558.0999             | 559.1071        | -4.4                | [M+H] <sup>+</sup>      | 507/331/201 | c      |
| 27  | 7.34                    | C <sub>17</sub> H <sub>20</sub> O <sub>9</sub>    | 5-O-Feruloylquinic acid                                                                                       | 368.1107             | 367.1029        | 0.5                 | [M-H] <sup>-</sup>      | 191/173/134 | e      |
| 28  | 7.63                    | C <sub>21</sub> H <sub>20</sub> O <sub>12</sub>   | Baicalin+O+H <sub>2</sub>                                                                                     | 464.0958             | 463.0885        | 0.3                 | [M-H] <sup>-</sup>      | 366/312/287 | d      |
| 29  | 7.90                    | C <sub>21</sub> H <sub>22</sub> O <sub>9</sub>    | Liquiritin                                                                                                    | 418.12638            | 417.1193        | 0.2                 | [M-H] <sup>-</sup>      | 255/135/119 | h      |
| 30  | 8.38                    | C <sub>20</sub> H <sub>26</sub> O <sub>14</sub> S | Verbascoside-<br>C <sub>9</sub> H <sub>6</sub> O <sub>4</sub> (cleavage)+2x(-H <sub>2</sub> )+SO <sub>3</sub> | 522.1022             | 521.0949        | -2                  | [M-H] <sup>-</sup>      | 475/451/323 | a,b    |



| NO. | R <sub>t</sub><br>(min) | Formula                                           | Component                                                                                                                   | Neutral mass<br>(Da) | Observed<br>m/z | Mass error<br>(mDa) | Ion mode                | Fragment    | Origin |
|-----|-------------------------|---------------------------------------------------|-----------------------------------------------------------------------------------------------------------------------------|----------------------|-----------------|---------------------|-------------------------|-------------|--------|
| 31  | 8.67                    | C <sub>9</sub> H <sub>10</sub> O <sub>2</sub>     | Paeoniflorin-<br>C <sub>16</sub> H <sub>22</sub> O <sub>10</sub> (cleavage)+H <sub>2</sub> +C <sub>2</sub> H <sub>2</sub> O | 150.0693             | 149.062         | 1.1                 | [M-H] <sup>-</sup>      | 137/113/93  | c      |
| 32  | 9.18                    | C <sub>21</sub> H <sub>25</sub> NO <sub>4</sub>   | Menisperine                                                                                                                 | 356.1862             | 356.188         | 0.5                 | M <sup>+</sup>          | 311/279/248 | e      |
| 33  | 9.27                    | C <sub>29</sub> H <sub>36</sub> O <sub>15</sub>   | Verbascoside                                                                                                                | 624.20542            | 623.1984        | 0.3                 | [M-H] <sup>-</sup>      | 315/135/161 | a,b    |
| 34  | 9.54                    | C <sub>20</sub> H <sub>19</sub> NO <sub>4</sub>   | Jatrorrhizine                                                                                                               | 338.1401             | 338.1382        | 0.3                 | M <sup>+</sup>          | 323/294     | e      |
| 35  | 9.98                    | C <sub>21</sub> H <sub>18</sub> O <sub>11</sub>   | Baicalin                                                                                                                    | 446.08491            | 447.0927        | 0.7                 | [M+H] <sup>+</sup>      | 423/407/396 | d      |
| 36  | 10.13                   | C <sub>27</sub> H <sub>28</sub> O <sub>16</sub>   | Liquiritin+O-H <sub>2</sub> +C <sub>6</sub> H <sub>8</sub> O <sub>6</sub>                                                   | 608.1383             | 607.131         | 0.6                 | [M-H] <sup>-</sup>      | 431/269/187 | h      |
| 37  | 10.83                   | C <sub>23</sub> H <sub>22</sub> O <sub>13</sub>   | Baicalein+H <sub>2</sub>                                                                                                    | 272.0692             | 273.0765        | 0.7                 | [M+H] <sup>+</sup>      | 259/177/131 | d      |
| 38  | 11.44                   | C <sub>17</sub> H <sub>14</sub> O <sub>8</sub>    | Viscidulin III                                                                                                              | 346.06887            | 345.0621        | 0.5                 | [M-H] <sup>-</sup>      | 345/330/315 | d      |
| 39  | 11.46                   | C <sub>20</sub> H <sub>17</sub> NO <sub>4</sub>   | Berberine                                                                                                                   | 336.1236             | 336.1236        | 0.1                 | M <sup>+</sup>          | 321/292     | e      |
| 40  | 12.90                   | C <sub>21</sub> H <sub>20</sub> O <sub>11</sub>   | Cynaroside                                                                                                                  | 448.10056            | 493.0982        | -0.6                | [M-H-COOH] <sup>-</sup> | 285/151     | d      |
| 41  | 12.88                   | C <sub>22</sub> H <sub>20</sub> O <sub>11</sub>   | Wogonoside                                                                                                                  | 460.10056            | 461.106         | 0.5                 | [M+H] <sup>+</sup>      | 285/270/242 | d      |
| 42  | 13.37                   | C <sub>23</sub> H <sub>34</sub> O <sub>18</sub>   | Rehmannioside D-<br>C <sub>6</sub> H <sub>10</sub> O <sub>5</sub> (cleavage)+2x(+O)+C <sub>2</sub> H <sub>2</sub> O         | 598.1725             | 599.1797        | -2.1                | [M+H] <sup>+</sup>      | 507/287/279 | a,b    |
| 43  | 13.80                   | C <sub>15</sub> H <sub>10</sub> O <sub>4</sub>    | Chrysin                                                                                                                     | 254.05791            | 253.0506        | 0                   | [M-H] <sup>-</sup>      | 299/253     | d      |
| 44  | 14.22                   | C <sub>31</sub> H <sub>40</sub> O <sub>15</sub>   | Isomartynoside                                                                                                              | 652.23672            | 651.2296        | 0.2                 | [M-H] <sup>-</sup>      | 615/506/475 | a,b    |
| 45  | 14.37                   | C <sub>42</sub> H <sub>58</sub> O <sub>19</sub> S | Glycyrrhizic acid+2x([M-H]-2)+SO <sub>3</sub>                                                                               | 898.3306             | 899.3379        | 1.5                 | [M+H] <sup>+</sup>      | 581/463/331 | h      |
| 46  | 14.66                   | C <sub>15</sub> H <sub>10</sub> O <sub>5</sub>    | Baicalein                                                                                                                   | 270.0534             | 271.0607        | 0.6                 | [M+H] <sup>+</sup>      | 271/253/243 | d      |
| 47  | 14.87                   | C <sub>20</sub> H <sub>16</sub> O <sub>6</sub>    | Semilicoisoflavone B                                                                                                        | 352.0954             | 353.1027        | 0.7                 | [M+H] <sup>+</sup>      | 311/325/299 | h      |
| 48  | 15.12                   | C <sub>47</sub> H <sub>78</sub> O <sub>18</sub>   | Asperosaponin VI-<br>C <sub>12</sub> H <sub>20</sub> O <sub>10</sub> (cleavage)+O+H <sub>2</sub> +SO <sub>3</sub>           | 702.3665             | 703.3738        | 1.6                 | [M+H] <sup>+</sup>      | 639/314/289 | f      |
| 49  | 15.53                   | C <sub>16</sub> H <sub>12</sub> O <sub>4</sub>    | Formononetin                                                                                                                | 268.074              | 269.0813        | 0.5                 | [M+H] <sup>+</sup>      | 254/238     | h      |
| 50  | 16.24                   | C <sub>47</sub> H <sub>76</sub> O <sub>18</sub>   | Asperosaponin VI                                                                                                            | 928.5025             | 927.4953        | 0.2                 | [M-H] <sup>-</sup>      | 603/323     | f      |
| 51  | 16.56                   | C <sub>23</sub> H <sub>26</sub> O <sub>12</sub>   | Albiflorin+O-H <sub>2</sub>                                                                                                 | 494.1435             | 493.1362        | 1.1                 | [M-H] <sup>-</sup>      | 317/287/227 | c      |

| NO. | R <sub>t</sub><br>(min) | Formula                                         | Component                                                 | Neutral mass<br>(Da) | Observed<br>m/z | Mass error<br>(mDa) | Ion mode           | Fragment    | Origin |
|-----|-------------------------|-------------------------------------------------|-----------------------------------------------------------|----------------------|-----------------|---------------------|--------------------|-------------|--------|
| 52  | 17.19                   | C <sub>15</sub> H <sub>16</sub> O <sub>3</sub>  | Batatasin III                                             | 244.10994            | 243.1026        | 0                   | [M-H] <sup>-</sup> | 277/183/136 | g      |
| 53  | 17.30                   | C <sub>16</sub> H <sub>12</sub> O <sub>5</sub>  | Wogonin                                                   | 284.06847            | 285.0771        | 0.1                 | [M+H] <sup>+</sup> | 270/242/213 | d      |
| 54  | 17.72                   | C <sub>17</sub> H <sub>14</sub> O <sub>6</sub>  | Baicalein+H <sub>2</sub> +C <sub>2</sub> H <sub>2</sub> O | 314.0804             | 315.0877        | 1.3                 | [M+H] <sup>+</sup> | 285/257/235 | d      |
| 55  | 18.19                   | C <sub>42</sub> H <sub>62</sub> O <sub>16</sub> | Glycyrrhizic acid                                         | 822.40379            | 821.3971        | 0.5                 | [M-H] <sup>-</sup> | 759/645/351 | h      |
| 56  | 18.33                   | C <sub>16</sub> H <sub>12</sub> O <sub>5</sub>  | Oroxylin A                                                | 284.0685             | 283.0606        | 0.4                 | [M-H] <sup>-</sup> | 268/265/225 | d      |
| 57  | 19.05                   | C <sub>21</sub> H <sub>20</sub> O <sub>5</sub>  | Gancaonin G                                               | 352.1311             | 353.1389        | -0.2                | [M+H] <sup>+</sup> | 193/213/167 | h      |
| 58  | 19.32                   | C <sub>26</sub> H <sub>30</sub> O <sub>7</sub>  | Obacunone                                                 | 454.19915            | 455.2070        | 0.6                 | [M+H] <sup>+</sup> | 437/409/436 | e      |
| 59  | 21.90                   | C <sub>30</sub> H <sub>46</sub> O <sub>4</sub>  | Glycyrrhetic acid                                         | 470.3396             | 471.3474        | 0.1                 | [M+H] <sup>+</sup> | 425/407/235 | h      |

**Note:** a: *Rehmannia glutinosa* Libosch., b: *Radix Rehmanniae Praeparata*, c: *Paeonia lactiflora* Pall., d: *Scutellaria baicalensis* Georgi, e: *Phellodendron chinense* Schneid., f: *Dipsacus asper* Wall. ex Henry, g: *Dioscorea opposita* Thunb., h: *Glycyrrhiza uralensis* Fisch.

**Table S4.** Correlation analysis results of effective components and biomarkers

| No. | Constituents                                                                                                        | Relevant<br>quantity | Source | No. | Constituents                                                                                                                | Relevant<br>quantity | Source |
|-----|---------------------------------------------------------------------------------------------------------------------|----------------------|--------|-----|-----------------------------------------------------------------------------------------------------------------------------|----------------------|--------|
| *1  | Catalpol                                                                                                            | 5                    | a,b    | 31  | Paeoniflorin-<br>C <sub>16</sub> H <sub>22</sub> O <sub>10</sub> (cleavage)+H <sub>2</sub> +C <sub>2</sub> H <sub>2</sub> O | 2                    | c      |
| *2  | Gallic acid                                                                                                         | 5                    | c,g    | 32  | Menisperine                                                                                                                 | 1                    | e      |
| 3   | Verbascoside-C <sub>9</sub> H <sub>6</sub> O <sub>3</sub> (cleavage)                                                | 2                    | a,b    | 33  | Verbascoside                                                                                                                | 1                    | a,b    |
| 4   | Logaric acid (Loganic acid)+H <sub>2</sub>                                                                          | 0                    | f      | 34  | Jatrorrhizine                                                                                                               | 2                    | e      |
| 5   | Catalpol-C <sub>6</sub> H <sub>10</sub> O <sub>5</sub> (cleavage)+O-H <sub>2</sub> +C <sub>2</sub> H <sub>2</sub> O | 2                    | a,b    | *35 | Baicalin                                                                                                                    | 6                    | d      |
| 6   | Verbascoside-C <sub>20</sub> H <sub>28</sub> O <sub>12</sub> (cleavage)-H <sub>2</sub>                              | 4                    | a,b    | *36 | Liquiritin+O-H <sub>2</sub> +C <sub>6</sub> H <sub>8</sub> O <sub>6</sub>                                                   | 5                    | h      |
| 7   | Ajugol                                                                                                              | 2                    | a,b    | 37  | Baicalein+H <sub>2</sub>                                                                                                    | 1                    | d      |

| No. | Constituents                                                                              | Relevant quantity | Source | No. | Constituents                                                                                                        | Relevant quantity | Source |
|-----|-------------------------------------------------------------------------------------------|-------------------|--------|-----|---------------------------------------------------------------------------------------------------------------------|-------------------|--------|
| *8  | Rehmannioside D                                                                           | 5                 | a,b    | 38  | Viscidulin III                                                                                                      | 2                 | d      |
| 9   | 8-Epiloganic acid                                                                         | 0                 | a,b    | *39 | Berberine                                                                                                           | 7                 | e      |
| 10  | Berberine-CHO(cleavage)+2x(-H <sub>2</sub> )+C <sub>6</sub> H <sub>8</sub> O <sub>6</sub> | 2                 | e      | 40  | Cynaroside                                                                                                          | 3                 | d      |
| 11  | Loganic acid                                                                              | 2                 | f      | 41  | Wogonoside                                                                                                          | 1                 | d      |
| *12 | Chlorogenic acid                                                                          | 6                 | e,f    | 42  | Rehmannioside D-<br>C <sub>6</sub> H <sub>10</sub> O <sub>5</sub> (cleavage)+2x(+O)+C <sub>2</sub> H <sub>2</sub> O | 3                 | a,b    |
| *13 | Phellodendrine                                                                            | 6                 | e      | 43  | Chrysin                                                                                                             | 3                 | d      |
| 14  | Neochlorogenic acid                                                                       | 2                 | e,f    | 44  | Isomartynoside                                                                                                      | 1                 | a,b    |
| 15  | Oxypaeoniflorin                                                                           | 3                 | c      | 45  | Glycyrrhizic acid+2x([M-H]-2)+SO <sub>3</sub>                                                                       | 3                 | h      |
| 16  | Caffeic acid                                                                              | 2                 | a,b    | 46  | Baicalein                                                                                                           | 2                 | d      |
| 17  | Berberine-CH(cleavage)+H <sub>2</sub> +C <sub>6</sub> H <sub>8</sub> O <sub>6</sub>       | 0                 | e      | 47  | Semilicoisoflavone B                                                                                                | 0                 | h      |
| 18  | Liquiritigenin+C <sub>6</sub> H <sub>8</sub> O <sub>6</sub>                               | 1                 | h      | 48  | Asperosaponin VI-<br>C <sub>12</sub> H <sub>20</sub> O <sub>10</sub> (cleavage)+O+H <sub>2</sub> +SO <sub>3</sub>   | 4                 | f      |
| 19  | Liquiritigenin                                                                            | 2                 | h      | 49  | Formononetin                                                                                                        | 1                 | h      |
| 20  | Loganin                                                                                   | 2                 | f      | *50 | Asperosaponin VI                                                                                                    | 5                 | f      |
| 21  | Albiflorin                                                                                | 3                 | c      | 51  | Albiflorin+O-H <sub>2</sub>                                                                                         | 3                 | c      |
| 22  | 4-O-Feruloylquinic acid                                                                   | 3                 | e      | 52  | Batatasin III                                                                                                       | 1                 | g      |
| 23  | Paeoniflorin-C <sub>6</sub> H <sub>10</sub> O <sub>6</sub> (cleavage)+SO <sub>3</sub>     | 2                 | c      | 53  | Wogonin                                                                                                             | 1                 | d      |
| *24 | Paeoniflorin                                                                              | 7                 | c      | 54  | Baicalein+H <sub>2</sub> +C <sub>2</sub> H <sub>2</sub> O                                                           | 2                 | d      |
| 25  | QuerceTIN                                                                                 | 1                 | h      | 55  | Glycyrrhizic acid                                                                                                   | 1                 | h      |
| 26  | Albiflorin-H <sub>2</sub> +SO <sub>3</sub>                                                | 3                 | c      | 56  | Oroxylin A                                                                                                          | 1                 | d      |
| 27  | 5-O-Feruloylquinic acid                                                                   | 2                 | e      | 57  | Gancaonin G                                                                                                         | 3                 | h      |
| *28 | Baicalin+O+H <sub>2</sub>                                                                 | 5                 | d      | 58  | Obacunone                                                                                                           | 2                 | e      |
| *29 | Liquiritin                                                                                | 6                 | h      | *59 | Glycyrrhetic acid                                                                                                   | 5                 | h      |

| No. | Constituents                                                                                              | Relevant quantity | Source | No. | Constituents | Relevant quantity | Source |
|-----|-----------------------------------------------------------------------------------------------------------|-------------------|--------|-----|--------------|-------------------|--------|
| 30  | Verbascoside-C <sub>9</sub> H <sub>6</sub> O <sub>4</sub> (cleavage)+2x(-H <sub>2</sub> )+SO <sub>3</sub> | 3                 | a,b    |     |              |                   |        |

**Note:** a: *Rehmannia glutinosa* Libosch., b: *Radix Rehmanniae Praeparata*, c: *Paeonia lactiflora* Pall., d: *Scutellaria baicalensis* Georgi, e: *Phellodendron chinense* Schneid., f: *Dipsacus asper* Wall. ex Henry, g: *Dioscorea opposita* Thunb., h: *Glycyrrhiza uralensis* Fisch. , “\*”: Correlation quantity>5.

**Table S5.** Content determination results in five batches of BYJ

| Component    | Batch number | Content (mg/g) | Average content (mg/g) | RSD (%) |
|--------------|--------------|----------------|------------------------|---------|
| Paeoniflorin | 1            | 8.386          | 8.558                  | 1.23    |
|              | 2            | 8.670          |                        |         |
|              | 3            | 8.559          |                        |         |
|              | 4            | 8.579          |                        |         |
|              | 5            | 8.596          |                        |         |
| Berberine    | 1            | 5.338          | 5.420                  | 1.8     |
|              | 2            | 5.412          |                        |         |
|              | 3            | 5.567          |                        |         |
|              | 4            | 5.328          |                        |         |
|              | 5            | 5.453          |                        |         |
| Baicalin     | 1            | 28.180         | 28.098                 | 1.3     |
|              | 2            | 27.900         |                        |         |
|              | 3            | 27.800         |                        |         |
|              | 4            | 27.910         |                        |         |
|              | 5            | 28.700         |                        |         |

|                   |   |       |       |      |
|-------------------|---|-------|-------|------|
| Asperosaponin VI  | 1 | 2.891 |       |      |
|                   | 2 | 2.953 |       |      |
|                   | 3 | 2.932 | 2.943 | 1.26 |
|                   | 4 | 2.944 |       |      |
|                   | 5 | 2.994 |       |      |
| Glycyrrhizic acid | 1 | 3.169 |       |      |
|                   | 2 | 3.287 |       |      |
|                   | 3 | 3.288 | 3.236 | 1.66 |
|                   | 4 | 3.195 |       |      |
|                   | 5 | 3.241 |       |      |

**Table S6.** Fingerprint similarity of 15 batches of BYJ

| Batch<br>number         | S1   | S2   | S3   | S4   | S5   | S6   | S7   | S8   | S9   | S10  | S11  | S12  | S13  | S14  | S15  |
|-------------------------|------|------|------|------|------|------|------|------|------|------|------|------|------|------|------|
| similarity<br>(control) | 0.99 | 0.99 | 0.99 | 0.99 | 0.99 | 0.99 | 0.99 | 0.94 | 0.97 | 0.98 | 0.96 | 0.98 | 0.96 | 0.98 | 0.98 |
